# Supplementary material for: Opti-Med: the effectiveness of optimised clinical medication reviews in older people with ‘geriatric giants’ in general practice; study protocol of a cluster randomised controlled trial
Source: BMC Geriatr. 2014 Nov 18;14:116. doi: 10.1186/1471-2318-14-116 (PMC4240827; doi:10.1186/1471-2318-14-116)
Supplement: Supplementary file 2 — Additional file 2: Format Pharmacotherapeutic Treatment Plan Opti-Med. (PDF 102 KB) [file 12877_2014_1051_MOESM2_ESM.pdf]

## Additional file 2. Format Pharmacotherapeutic Treatment Plan Opti-Med

| Pharmacotherapeutic Treatment Plan Opti-Med |                                                    |
|---------------------------------------------|----------------------------------------------------|
| Date consultation                           |                                                    |
| Name GP                                     |                                                    |
| Time investment (incl. preparation)         | <div>Minutes</div> <div>Home visit: YES / NO</div> |

[illegible]
